# Supplementary material
Source: HighWire-hosted journal article supplement (https://bmjopen.bmj.com/content/9/4/e024506)
Supplement: inline-supplementary-material-2 [file inline-supplementary-material-2.pdf]

Supplementary document to:

**Does service heterogeneity have an impact on acute hospital length of stay in stroke? A UK-based multi-centre prospective cohort study**

Michelle Tørnes, David McLernon, Max O Bachmann, Stanley D Musgrave, Elizabeth A Warburton, John F Potter, Phyo Kyaw Myint: On behalf of the Anglia Stroke Clinical Network Evaluation Study (ASCNES) Group

## CONTENT

**Table S1** Variables used to inform multiple imputation of missing data

**Table S2** Sample characteristics distribution of the 2333 patients included in analysis per individual hospital (n (%)) unless otherwise stated)

**Table S3** Sample characteristics of complete cases and those with at least one variable missing

**Table S4** Univariable regression analysis for multiple imputed dataset for AHLOS (n=2233)

**Table S5** Univariable linear regression complete case analysis for AHLOS

**Table S6** Multiple linear regression complete case analysis for AHLOS (n=1496,  $R^2=44.7\%$ )

**Table S7** Multiple linear regression sensitivity analysis for AHLOS, excluding Hospital 2 using multiple imputed dataset (n=2217,  $R^2=44.7\%$ )

**Table S8** Multiple linear regression sensitivity analysis for AHLOS, including discharge destination using multiple imputed dataset (n=2233,  $R^2=40\%$ )

**Figure S1** Model estimates of mean baseline acute hospital length of stay (AHLOS) per hospital (in days) and number of stroke patients treated outside the stroke unit per day per five stroke unit beds with 95% confidence intervals. Multiple regression model was adjusted for patient covariates that had a p-value<0.3 in univariable analysis.

**Figure S2** Model estimates of mean baseline acute hospital length of stay (AHLOS) per hospital (in days) and presence of vascular surgery onsite with 95% confidence intervals. Multiple regression model was adjusted for patient covariates that had a p-value<0.3 in univariable analysis.

**Figure S3** Model estimates of mean baseline acute hospital length of stay (AHLOS) per hospital (in days) and distance to neurosurgical facility with 95% confidence intervals. Multiple regression model was adjusted for patient covariates that had a p-value<0.3 in univariable analysis.

**Figure S4** Model estimates of mean baseline acute hospital length of stay (AHLOS) per hospital (in days) and number of fte senior doctors per five beds available during weekdays with 95% confidence intervals. Multiple regression model was adjusted for patient covariates that had a p-value<0.3 in univariable analysis.

**Figure S5** Model estimates of mean baseline acute hospital length of stay (AHLOS) per hospital (in days) and number of fte junior doctors per five beds available during weekdays with 95% confidence intervals. Multiple regression model was adjusted for patient covariates that had a p-value<0.3 in univariable analysis.

**Figure S6** Model estimates of mean baseline acute hospital length of stay (AHLOS) per hospital (in days) and number of fte health care associates and nurses per five beds with 95% confidence intervals. Multiple regression model was adjusted for patient covariates that had a p-value<0.3 in univariable analysis.

**Figure S7** Model estimates of mean baseline acute hospital length of stay (AHLOS) per hospital (in days) and number of fte occupational therapists per five beds with 95% confidence intervals. Multiple regression model was adjusted for patient covariates that had a p-value<0.3 in univariable analysis.

**Figure S8** Model estimates of mean baseline acute hospital length of stay (AHLOS) per hospital (in days) and number of fte physiotherapists per five beds with 95% confidence intervals. Multiple regression model was adjusted for patient covariates that had a p-value<0.3 in univariable analysis.

**Figure S9** Model estimates of mean baseline acute hospital length of stay (AHLOS) per hospital (in days) and number of fte speech and language therapists per five beds with 95% confidence intervals. Multiple regression model was adjusted for patient covariates that had a p-value<0.3 in univariable analysis.

**Figure S10** Model estimates of mean baseline acute hospital length of stay (AHLOS) per hospital (in days) and number of total beds present on stroke unit per 100 admissions with 95% confidence intervals. Multiple regression model was adjusted for patient covariates that had a p-value<0.3 in univariable analysis.

**Figure S11** Model estimates of mean baseline acute hospital length of stay (AHLOS) per hospital (in days) and number of hospital beds per computed tomography (CT) scanner with 95% confidence intervals. Multiple regression model was adjusted for patient covariates that had a p-value<0.3 in univariable analysis.

**Figure S12** Model estimates of mean baseline acute hospital length of stay (AHLOS) per hospital (in days) and provision of onsite rehabilitation service with 95% confidence intervals. Multiple regression model was adjusted for patient covariates that had a p-value<0.3 in univariable analysis.

**Figure S13** Model estimates of mean baseline acute hospital length of stay (AHLOS) per hospital (in days) and presence of early supported discharge scheme with 95% confidence intervals. Multiple regression model was adjusted for patient covariates that had a p-value<0.3 in univariable analysis.

**Figure S14** Model estimates of mean baseline acute hospital length of stay (AHLOS) per hospital (in days) and number of non-stroke patients present on the stroke unit per day per five stroke unit beds with 95% confidence intervals. Multiple regression model was adjusted for patient covariates that had a p-value<0.3 in univariable analysis.

**Figure S15** Model estimates of mean baseline acute hospital length of stay (AHLOS) per hospital (in days) and mean Index of Multiple Deprivation (IMD) score of the counties in which the hospital serves with 95% confidence intervals. Multiple regression model was adjusted for patient covariates that had a p-value<0.3 in univariable analysis.

**Table S1** Variables used to inform multiple imputation of missing data

| Variable                                         | Measure                                                                                                                                                     |
|--------------------------------------------------|-------------------------------------------------------------------------------------------------------------------------------------------------------------|
| <b>I. Independent Variables</b>                  |                                                                                                                                                             |
| Trust                                            | 0=Trust 1 1=Trust 2 2=Trust 3 3=Trust 4 4=Trust 5 4=Trust 6 5=Trust 7 6=Trust 8                                                                             |
| Sex                                              | 0=Male 1=Female                                                                                                                                             |
| Age                                              | Continuous, years                                                                                                                                           |
| Recurrent Stroke                                 | 0=No 1=Yes                                                                                                                                                  |
| Diabetes Mellitus                                | 0=No 1=Yes                                                                                                                                                  |
| Dementia                                         | 0=No 1=Yes                                                                                                                                                  |
| Hypercholesterolemia                             | 0=No 1=Yes                                                                                                                                                  |
| Myocardial Infarction or Ischaemic Heart Disease | 0=No 1=Yes                                                                                                                                                  |
| Transient Ischaemic Attack                       | 0=No 1=Yes                                                                                                                                                  |
| Previous Cancer                                  | 0=No 1=Yes                                                                                                                                                  |
| Active Cancer                                    | 0=No 1=Yes                                                                                                                                                  |
| Depression                                       | 0=No 1=Yes                                                                                                                                                  |
| Rheumatoid Arthritis                             | 0=No 1=Yes                                                                                                                                                  |
| Chronic Obstructive Pulmonary Disease            | 0=No 1=Yes                                                                                                                                                  |
| Pre-Stroke modified Rankin Score (mRS)           | 0=0 1=1 2=2 3=3 4=4 & 5                                                                                                                                     |
| Pre-Stroke Residence                             | 0=Independent living without formal care<br>1=Independent living with formal care<br>2=Institutional care                                                   |
| Stroke Type                                      | 0=Ischaemic 1=Haemorrhagic                                                                                                                                  |
| Oxfordshire Community Stroke Classification      | 0=LACS 1=PACS 2=POCS 3=TACS                                                                                                                                 |
| Brain Lateralisation                             | 0=Yes 1=No                                                                                                                                                  |
| Inpatient Complication                           | 0=No 1=Yes                                                                                                                                                  |
| Discharge modified Rankin Score (mRS)            | 0=0 1=1 2=2 3=3 4=4 5=5 6=6                                                                                                                                 |
| Season of Admission                              | 0=Summer 1=Winter                                                                                                                                           |
| Day of Admission                                 | 0=Weekday 1=Weekend                                                                                                                                         |
| <b>II. Dependent Variable</b>                    |                                                                                                                                                             |
| Logarithmic acute hospital LOS                   | Continuous, days                                                                                                                                            |
| <b>III. Auxiliary Variables</b>                  |                                                                                                                                                             |
| Discharge Destination                            | 0=Independent living without formal care<br>1=Independent living with formal care<br>2=Institutional care<br>3=Interim or rehabilitation setting<br>4=Death |
| Atrial Fibrillation                              | 0=No 1=Yes                                                                                                                                                  |
| Baseline Systolic Blood Pressure                 | Continuous, mmHg                                                                                                                                            |
| Baseline Diastolic Blood Pressure                | Continuous, mmHg                                                                                                                                            |
| Glucose Concentration on Admission               | Continuous, mmol/L                                                                                                                                          |
| Weight                                           | Continuous, kg                                                                                                                                              |
| Heart Rate                                       | Continuous, beats per minute                                                                                                                                |
| Temperature                                      | Continuous, °C                                                                                                                                              |
| Oxygen Saturation                                | Continuous, %                                                                                                                                               |
| ITU or HDU admission                             | 0. No 1. Yes                                                                                                                                                |
| Systolic Blood Pressure at Discharge             | Continuous, mmHg                                                                                                                                            |
| Diastolic Blood Pressure at Discharge            | Continuous, mm Hg                                                                                                                                           |

LOS, Length of Stay; ITU, Intensive Care Unit; HDU, High Dependency Unit.

**Table S2** Sample characteristics of the 2333 patients included in analysis per individual hospital (n (%)) unless otherwise stated)

| Variables                                        | Hospital 1<br>350<br>(16) | Hospital 2<br>16<br>(1) | Hospital 3<br>350<br>(16) | Hospital 4<br>143<br>(6) | Hospital 5<br>618<br>(28) | Hospital 6<br>281<br>(13) | Hospital 7<br>252<br>(11) | Hospital 8<br>223<br>(10) |
|--------------------------------------------------|---------------------------|-------------------------|---------------------------|--------------------------|---------------------------|---------------------------|---------------------------|---------------------------|
| Age, y, median (IQR)                             | 78<br>(68 to 85)          | 87<br>(81 to 92)        | 79<br>(72 to 86)          | 79<br>(70 to 86)         | 79<br>(71 to 85)          | 78<br>(71 to 85)          | 80<br>(68 to 85)          | 80<br>(71 to 87)          |
| Sex, female                                      | 180 (52)                  | 9 (56)                  | 197 (56)                  | 76 (53)                  | 309 (50)                  | 155 (55)                  | 116 (46)                  | 123 (55)                  |
| Recurrent Stroke                                 | 50 (14)                   | 5 (31)                  | 61 (17)                   | 19 (17)                  | 143 (23)                  | 62 (22)                   | 66 (26)                   | 42 (19)                   |
| Diabetes Mellitus                                | 48 (14)                   | 1 (6)                   | 59 (17)                   | 17 (15)                  | 92 (15)                   | 66 (23)                   | 44 (17)                   | 43 (19)                   |
| Dementia                                         | 26 (7)                    | 1 (6)                   | 35 (10)                   | 10 (9)                   | 58 (9)                    | 29 (10)                   | 23 (9)                    | 25 (11)                   |
| Hypercholesterolemia                             | 48 (14)                   | 3 (19)                  | 24 (7)                    | 7 (6)                    | 61 (10)                   | 80 (28)                   | 38 (15)                   | 94 (42)                   |
| Hypertensive                                     | 225 (64)                  | 8 (50)                  | 202 (58)                  | 56 (50)                  | 446 (72)                  | 200 (71)                  | 187 (74)                  | 159 (71)                  |
| Myocardial Infarction or Ischaemic Heart Disease | 45 (13)                   | 3 (19)                  | 87 (25)                   | 30 (27)                  | 142 (23)                  | 80 (28)                   | 49 (19)                   | 81 (36)                   |
| Transient Ischaemic Attack                       | 32 (9)                    | 3 (19)                  | 58 (17)                   | 17 (15)                  | 113 (18)                  | 40 (14)                   | 47 (19)                   | 30 (13)                   |
| Previous Cancer                                  | 33 (9)                    | 1 (6)                   | 38 (11)                   | 12 (11)                  | 41 (7)                    | 18 (6)                    | 21 (8)                    | 31 (14)                   |
| Active Cancer                                    | 24 (7)                    | 2 (12)                  | 8 (2)                     | 10 (9)                   | 49 (8)                    | 9 (3)                     | 20 (8)                    | 15 (7)                    |
| Depression                                       | 13 (4)                    | 0 (0)                   | 17 (5)                    | 8 (7)                    | 33 (5)                    | 11 (4)                    | 18 (7)                    | 17 (8)                    |
| Rheumatoid Arthritis                             | 11 (3)                    | 1 (6)                   | 43 (12)                   | 3 (3)                    | 83 (13)                   | 2 (1)                     | 7 (3)                     | 4 (2)                     |
| COPD                                             | 15 (4)                    | 1 (6)                   | 20 (6)                    | 6 (5)                    | 26 (4)                    | 20 (7)                    | 11 (4)                    | 17 (8)                    |
| Pre-stroke mRS Score                             |                           |                         |                           |                          |                           |                           |                           |                           |
| 0                                                | 84 (43)                   | 3 (19)                  | 117 (36)                  | -                        | 330 (56)                  | 126 (64)                  | 136 (56)                  | 118 (53)                  |
| 1                                                | 60(31)                    | 3 (19)                  | 75 (23)                   | -                        | 87 (15)                   | 16 (8)                    | 61 (25)                   | 33 (15)                   |
| 2                                                | 24 (12)                   | 3 (19)                  | 51 (16)                   | -                        | 56 (9)                    | 17 (9)                    | 16 (7)                    | 24 (11)                   |
| 3                                                | 21 (11)                   | 2 (12)                  | 38 (12)                   | -                        | 60 (10)                   | 20 (10)                   | 15 (6)                    | 28 (13)                   |
| 4 & 5                                            | 7 (4)                     | 5 (31)                  | 44 (14)                   | -                        | 57 (10)                   | 18 (9)                    | 16 (7)                    | 20 (9)                    |
| Pre-Stroke Residence                             |                           |                         |                           |                          |                           |                           |                           |                           |
| Independent living with formal care              | 21 (6)                    | 4 (25)                  | 23 (7)                    | 15 (14)                  | 62 (10)                   | 30 (11)                   | 34 (13)                   | 21 (10)                   |
| Independent living w/o formal care               | 292 (86)                  | 9 (56)                  | 285 (82)                  | 86 (77)                  | 493 (80)                  | 215 (77)                  | 193 (77)                  | 179 (82)                  |
| Institution                                      | 28 (8)                    | 3 (19)                  | 40 (11)                   | 10 (9)                   | 63 (10)                   | 35 (12)                   | 23 (9)                    | 18 (8)                    |

| Variables                                      | Hospital 1<br>350<br>(16) | Hospital 2<br>16<br>(1) | Hospital 3<br>350<br>(16) | Hospital 4<br>143<br>(6) | Hospital 5<br>618<br>(28) | Hospital 6<br>281<br>(13) | Hospital 7<br>252<br>(11) | Hospital 8<br>223<br>(10) |
|------------------------------------------------|---------------------------|-------------------------|---------------------------|--------------------------|---------------------------|---------------------------|---------------------------|---------------------------|
| Stroke Type                                    |                           |                         |                           |                          |                           |                           |                           |                           |
| Ischaemic                                      | 293 (85)                  | 14 (100)                | 286 (87)                  | 90 (91)                  | 541 (88)                  | 233 (85)                  | 213 (87)                  | 194 (88)                  |
| Haemorrhagic                                   | 50 (15)                   | 0 (0)                   | 43 (13)                   | 9 (9)                    | 73 (12)                   | 40 (15)                   | 32 (13)                   | 26 (12)                   |
| Oxford Community Stroke Project Classification |                           |                         |                           |                          |                           |                           |                           |                           |
| LACS                                           | 64 (24)                   | 1 (7)                   | 95 (29)                   | 20 (28)                  | 149 (25)                  | 51 (18)                   | 39 (19)                   | 84 (39)                   |
| PACS                                           | 117 (43)                  | 11 (79)                 | 109 (33)                  | 38 (54)                  | 216 (37)                  | 147 (53)                  | 80 (39)                   | 66 (30)                   |
| POCS                                           | 51 (19)                   | -                       | 29 (9)                    | 3 (4)                    | 117 (20)                  | 21 (8)                    | 33 (16)                   | 25 (12)                   |
| TACS                                           | 38 (14)                   | 2 (14)                  | 99 (30)                   | 10 (14)                  | 107 (18)                  | 57 (21)                   | 52 (25)                   | 42 (19)                   |
| No Brain Lateralisation                        | 50 (15)                   | 2 (13)                  | 14 (4)                    | 9 (9)                    | 129 (21)                  | 1 (0.4)                   | 30 (12)                   | 9 (4)                     |
| Inpatient Complication                         | 108 (31)                  | 4 (25)                  | 34 (10)                   | 36 (25)                  | 229 (37)                  | 109 (39)                  | 83 (33)                   | 52 (23)                   |
| Discharge mRS Score                            |                           |                         |                           |                          |                           |                           |                           |                           |
| 0                                              | 37 (15)                   | 0 (0)                   | 11 (3)                    | 0 (0)                    | 114 (19)                  | 34 (16)                   | 42 (17)                   | 22 (10)                   |
| 1                                              | 65 (25)                   | 2 (12)                  | 55 (17)                   | 0 (0)                    | 97 (16)                   | 25 (12)                   | 55 (23)                   | 53 (24)                   |
| 2                                              | 36 (14)                   | 1 (6)                   | 46 (14)                   | 0 (0)                    | 57 (10)                   | 20 (9)                    | 33 (14)                   | 19 (9)                    |
| 3                                              | 41 (16)                   | 4 (25)                  | 40 (12)                   | 0 (0)                    | 87 (15)                   | 36 (17)                   | 34 (14)                   | 49 (22)                   |
| 4                                              | 19 (7)                    | 3 (19)                  | 57 (17)                   | 0 (0)                    | 89 (15)                   | 25 (12)                   | 16 (7)                    | 29 (13)                   |
| 5                                              | 4 (2)                     | 1 (6)                   | 47 (14)                   | 0 (0)                    | 40 (7)                    | 14 (7)                    | 16 (7)                    | 15 (7)                    |
| 6                                              | 53 (21)                   | 5 (31)                  | 77 (23)                   | 29 (100)                 | 110 (19)                  | 58 (27)                   | 47 (19)                   | 35 (16)                   |
| Winter Admission                               | 172 (49)                  | 16 (100)                | 181 (52)                  | 73 (51)                  | 332 (54)                  | 140 (50)                  | 131 (52)                  | 114 (51)                  |
| Weekend Admission                              | 113 (32)                  | 3 (19)                  | 98 (28)                   | 43 (30)                  | 177 (29)                  | 74 (26)                   | 55 (22)                   | 51 (23)                   |

IQR, Interquartile Range; COPD, Chronic Obstructive Pulmonary Disease; mRS, modified Rankin Scale; LACS, Lacunar Anterior Circulation Stroke; PACS, Partial Anterior Circulation Stroke; POCS, Posterior Circulation Stroke; TACS, Total Anterior Circulation Stroke.



**Table S3** Sample characteristics of complete cases and those with at least one variable missing

| Patient Characteristic                              | Complete Cases<br>(n=1496) | Cases with at least<br>one missing variable | <i>P</i> |
|-----------------------------------------------------|----------------------------|---------------------------------------------|----------|
|                                                     | Median (IQR) or No. (%)    |                                             |          |
| Age, y*                                             | 79 (71 to 86)              | 79 (70 to 86)                               | 0.34     |
| Sex, female†                                        | 781 (52)                   | 384 (52)                                    | 1        |
| Comorbidities†                                      |                            |                                             |          |
| Recurrent Stroke                                    | 328 (22)                   | 120 (17)                                    | 0.01     |
| Diabetes Mellitus                                   | 259 (17)                   | 111 (16)                                    | 0.38     |
| Dementia                                            | 138 (9)                    | 69 (10)                                     | 0.75     |
| Hypercholesterolemia                                | 264 (18)                   | 91 (13)                                     | 0.01     |
| Hypertensive                                        | 1054 (70)                  | 429 (61)                                    | <0.001   |
| Myocardial Infarction or Ischaemic<br>Heart Disease | 362(24)                    | 155 (22)                                    | 0.26     |
| TIA                                                 | 248 (17)                   | 92 (13)                                     | 0.04     |
| Previous Cancer                                     | 140 (9)                    | 55 (8)                                      | 0.25     |
| Active Cancer                                       | 93 (6)                     | 44 (6)                                      | 1        |
| Depression                                          | 79 (5)                     | 38 (5)                                      | 1        |
| Rheumatoid Arthritis                                | 129 (9)                    | 25 (3)                                      | <0.001   |
| COPD                                                | 76 (5)                     | 40 (6)                                      | 0.64     |
| Pre-stroke mRS Score‡                               |                            |                                             | 0.62     |
| 0                                                   | 765 (51)                   | 149 (51)                                    |          |
| 1                                                   | 284 (19)                   | 51 (17)                                     |          |
| 2                                                   | 167 (11)                   | 24 (8)                                      |          |
| 3                                                   | 149 (10)                   | 35 (12)                                     |          |
| 4 & 5                                               | 131 (9)                    | 36 (12)                                     |          |
| Pre-stroke Residence†                               |                            |                                             | <0.001   |
| Independent living with formal care                 | 145 (10)                   | 65 (9)                                      |          |
| Independent living without formal<br>Institution    | 1215 (81)                  | 537 (78)                                    |          |
| 136 (9)                                             | 84 (12)                    |                                             |          |
| Haemorrhagic Stroke†                                | 138 (9)                    | 135 (21)                                    | <0.001   |
| Oxford Community Stroke Project‡                    |                            |                                             | 0.05     |
| LACS                                                | 411 (27)                   | 92 (19)                                     |          |
| PACS                                                | 570 (38)                   | 214 (45)                                    |          |
| POCS                                                | 214 (14)                   | 65 (14)                                     |          |
| TACS                                                | 301 (20)                   | 106 (22)                                    |          |
| No Brain Lateralisation†                            | 174 (12)                   | 70 (12)                                     | 0.74     |
| Inpatient Complication†                             | 421 (28)                   | 234 (32)                                    | 0.09     |
| Discharge mRS Score‡                                |                            |                                             | 0.02     |
| 0                                                   | 218 (15)                   | 42 (10)                                     |          |
| 1                                                   | 295 (20)                   | 57 (14)                                     |          |
| 2                                                   | 177 (12)                   | 35 (9)                                      |          |
| 3                                                   | 243 (16)                   | 48 (12)                                     |          |
| 4                                                   | 209 (14)                   | 29 (7)                                      |          |
| 5                                                   | 121 (8)                    | 16 (4)                                      |          |
| 6                                                   | 233 (16)                   | 181 (44)                                    |          |

|                    |          |          |      |
|--------------------|----------|----------|------|
| Winter Admission†  | 770 (51) | 389 (53) | 0.59 |
| Weekend Admission† | 401 (27) | 213 (29) | 0.32 |

---

IQR, Interquartile Range; TIA, Transient Ischaemic Attack; COPD, Chronic Obstructive Pulmonary Disease; mRS, modified Rankin Scale; LACS, Lacunar Anterior Circulation Stroke; PACS, Partial Anterior Circulation Stroke; POCS, Posterior Circulation Stroke; TACS, Total Anterior Circulation Stroke.

*\*Two sample t-test*

*†  $\chi^2$  test*

*‡  $\chi^2$  test for trend*

**Table S4** Univariable regression analysis for multiple imputed dataset for AHLOS (n=2233)

| Patient Characteristic                                              | $\beta$ | 95% CI       | <i>P</i> | R <sup>2</sup> |
|---------------------------------------------------------------------|---------|--------------|----------|----------------|
| Age, y                                                              | 1.02    | 1.02 to 1.02 | <0.001   | 4.8            |
| Sex, female                                                         | 1.20    | 1.10 to 1.31 | <0.001   | 0.7            |
| Recurrent Stroke                                                    | 1.17    | 1.05 to 1.31 | 0.01     | 0.4            |
| Diabetes Mellitus                                                   | 1.16    | 1.03 to 1.31 | 0.02     | 0.3            |
| Dementia                                                            | 1.46    | 1.25 to 1.70 | <0.001   | 1.1            |
| Hypercholesterolemia                                                | 0.84    | 0.75 to 0.95 | 0.01     | 0.3            |
| Hypertensive                                                        | 1.02    | 0.93 to 1.12 | 0.66     | 0              |
| Myocardial Infarction/ Ischaemic Heart Disease*                     | 1.07    | 0.96 to 1.19 | 0.23     | 0.1            |
| TIA                                                                 | 1.07    | 0.94 to 1.21 | 0.30     | 0.1            |
| Previous Cancer                                                     | 1.23    | 1.05 to 1.44 | 0.01     | 0.3            |
| Active Cancer                                                       | 0.97    | 0.80 to 1.16 | 0.72     | 0              |
| Depression                                                          | 1.06    | 0.86 to 1.29 | 0.59     | 0              |
| Rheumatoid Arthritis                                                | 1.10    | 0.92 to 1.31 | 0.31     | 0.1            |
| COPD                                                                | 0.86    | 0.71 to 1.06 | 0.15     | 0.1            |
| Pre-stroke mRS Score (reference 0)                                  |         |              | <0.001   | 5.5            |
| 1                                                                   | 1.57    | 1.38 to 1.79 | <0.001   |                |
| 2                                                                   | 1.63    | 1.39 to 1.91 | <0.001   |                |
| 3                                                                   | 1.94    | 1.65 to 2.28 | <0.001   |                |
| 4 & 5                                                               | 1.32    | 1.13 to 1.55 | <0.001   |                |
| Pre-stroke Residence (reference Independent living w/o formal care) |         |              | <0.001   | 1.4            |
| Independent living with formal care                                 | 1.52    | 1.31 to 1.77 | <0.001   |                |
| Institution                                                         | 1.13    | 0.97 to 1.31 | 0.11     |                |
| Haemorrhagic Stroke                                                 | 0.83    | 0.73 to 0.96 | 0.01     | 0.3            |
| Oxford Community Stroke Project Classification (reference LACS)     |         |              | <0.001   | 4.0            |
| PACS                                                                | 1.62    | 1.44 to 1.82 | <0.001   |                |
| POCS                                                                | 1.22    | 1.05 to 1.42 | 0.01     |                |
| TACS                                                                | 1.66    | 1.45 to 1.90 | <0.001   |                |
| Brain Lateralisation                                                | 0.69    | 0.60 to 0.80 | <0.001   | 1.2            |
| Inpatient Complication                                              | 2.13    | 1.94 to 2.34 | <0.001   | 10.3           |
| Discharge mRS Score (reference 0)                                   |         |              | <0.001   | 31.1           |
| 1                                                                   | 1.24    | 1.07 to 1.42 | 0.003    |                |
| 2                                                                   | 2.04    | 1.75 to 2.39 | <0.001   |                |
| 3                                                                   | 3.35    | 2.90 to 3.87 | <0.001   |                |
| 4                                                                   | 4.20    | 3.60 to 4.90 | <0.001   |                |
| 5                                                                   | 6.67    | 5.62 to 7.91 | <0.001   |                |
| 6                                                                   | 1.57    | 1.37 to 1.80 | <0.001   |                |
| Winter Admission                                                    | 1.20    | 1.09 to 1.31 | <0.001   | 0.7            |
| Weekend Admission                                                   | 1.08    | 0.98 to 1.20 | 0.12     | 0.1            |
| Hospital (reference 1)                                              |         |              | <0.001   | 2.4            |
| 2                                                                   | 2.69    | 1.58 to 4.58 | <0.001   |                |
| 3                                                                   | 1.19    | 1.02 to 1.39 | 0.03     |                |
| 4                                                                   | 1.24    | 1.01 to 1.53 | 0.04     |                |
| 5                                                                   | 0.86    | 0.75 to 0.99 | 0.03     |                |
| 6                                                                   | 1.11    | 0.94 to 1.31 | 0.22     |                |
| 7                                                                   | 1.18    | 1.00 to 1.41 | 0.05     |                |

| Patient Characteristic | $\beta$ | 95% CI       | <i>P</i> | $R^2$ |
|------------------------|---------|--------------|----------|-------|
| 8                      | 0.86    | 0.72 to 1.03 | 0.11     |       |

AHLOS, Acute Hospital Length of Stay; CI, Confidence Interval; TIA, Transient Ischaemic Attack; COPD, Chronic Obstructive Pulmonary Disease; mRS, modified Rankin Scale; LACS, Lacunar Anterior Circulation Stroke; PACS, Partial Anterior Circulation Stroke; POCS, Posterior Circulation Stroke; TACS, Total Anterior Circulation Stroke.

**Table S5** Univariable linear regression complete case analysis for AHLOS

| Patient Characteristic                                                  | N            | $\beta$ | 95% CI       | P      | % R <sup>2</sup> |
|-------------------------------------------------------------------------|--------------|---------|--------------|--------|------------------|
| Age, y                                                                  | 2231         | 1.02    | 1.02 to 1.02 | <0.001 | 4.7              |
| Sex, female                                                             | 1165 v. 1066 | 1.20    | 1.10 to 1.31 | <0.001 | 0.7              |
| Recurrent Stroke                                                        | 448 v. 1755  | 1.17    | 1.05 to 1.31 | 0.005  | 0.3              |
| Diabetes Mellitus                                                       | 370 v. 1833  | 1.16    | 1.03 to 1.31 | 0.02   | 0.2              |
| Dementia                                                                | 207 v. 1996  | 1.46    | 1.25 to 1.70 | <0.001 | 1.0              |
| Hypercholesterolemia                                                    | 355 v. 1848  | 0.85    | 0.75 to 0.95 | 0.01   | 0.3              |
| Hypertensive                                                            | 1483 v. 720  | 1.03    | 0.93 to 1.13 | 0.57   | 0                |
| Myocardial Infarction or Ischaemic Heart Disease*                       | 517 v. 1686  | 1.07    | 0.96 to 1.19 | 0.23   | 0                |
| TIA                                                                     | 340 v. 1863  | 1.06    | 0.94 to 1.20 | 0.32   | 0                |
| Previous Cancer                                                         | 195 v. 2008  | 1.23    | 1.05 to 1.44 | 0.01   | 0.3              |
| Active Cancer                                                           | 137 v. 2066  | 0.96    | 0.80 to 1.15 | 0.65   | 0                |
| Depression                                                              | 117 v. 2086  | 1.05    | 0.86 to 1.28 | 0.65   | 0                |
| Rheumatoid Arthritis                                                    | 154 v. 2049  | 1.10    | 0.92 to 1.31 | 0.31   | 0                |
| COPD                                                                    | 116 v. 2087  | 0.86    | 0.70 to 1.05 | 0.14   | 0.1              |
| Pre-stroke mRS Score (reference 0)                                      |              |         |              | <0.001 | 5.8              |
| 1                                                                       | 335 v. 914   | 1.58    | 1.39 to 1.80 | <0.001 |                  |
| 2                                                                       | 191 v. 914   | 1.62    | 1.38 to 1.90 | <0.001 |                  |
| 3                                                                       | 184 v. 914   | 1.97    | 1.67 to 2.31 | <0.001 |                  |
| 4 & 5                                                                   | 167 v. 914   | 1.45    | 1.22 to 1.71 | <0.001 |                  |
| Pre-stroke Residence (reference Independent living without formal care) |              |         |              | <0.001 | 1.3              |
| Independent living with formal care                                     | 210 v. 1752  | 1.52    | 1.31 to 1.77 | <0.001 |                  |
| Institution                                                             | 220 v. 1752  | 1.14    | 0.98 to 1.32 | 0.09   |                  |
| Haemorrhagic Stroke                                                     | 273 v. 1864  | 0.85    | 0.74 to 0.97 | 0.02   | 0.2              |
| Oxford Community Stroke Project Classification (reference LACS)         |              |         |              | <0.001 | 4.3              |
| PACS                                                                    | 784 v. 503   | 1.62    | 1.44 to 1.82 | <0.001 |                  |
| POCS                                                                    | 279 v. 503   | 1.24    | 1.06 to 1.44 | 0.01   |                  |
| TACS                                                                    | 407 v. 503   | 1.75    | 1.53 to 2.01 | <0.001 |                  |
| No Brain Lateralisation                                                 | 244 v. 1822  | 0.68    | 0.59 to 0.79 | <0.001 | 1.3              |
| Inpatient Complication                                                  | 655 v. 1578  | 2.13    | 1.94 to 2.34 | <0.001 | 10               |
| Discharge mRS Score (reference 0)                                       |              |         |              | <0.001 | 30.1             |
| 1                                                                       | 352 v. 260   | 1.25    | 1.08 to 1.44 | 0.002  |                  |
| 2                                                                       | 212 v. 260   | 2.01    | 1.72 to 2.36 | <0.001 |                  |
| 3                                                                       | 291 v. 260   | 3.30    | 2.84 to 3.82 | <0.001 |                  |
| 4                                                                       | 238 v. 260   | 4.17    | 3.57 to 4.87 | <0.001 |                  |
| 5                                                                       | 137 v. 260   | 6.97    | 5.81 to 8.37 | <0.001 |                  |
| 6                                                                       | 414 v. 260   | 1.58    | 1.38 to 1.81 | <0.001 |                  |
| Winter Admission                                                        | 1159 v. 1074 | 1.20    | 1.09 to 1.31 | <0.001 | 0.6              |
| Weekend Admission                                                       | 614 v. 1619  | 1.08    | 0.98 to 1.20 | 0.12   | 0.1              |
| Hospital (reference 1)                                                  |              |         |              | <0.001 | 2.1              |
| 2                                                                       | 16 v. 350    | 2.69    | 1.58 to 4.58 | <0.001 |                  |
| 3                                                                       | 350 v. 350   | 1.19    | 1.02 to 1.39 | 0.03   |                  |
| 4                                                                       | 143 v. 350   | 1.24    | 1.01 to 1.53 | 0.04   |                  |
| 5                                                                       | 618 v. 350   | 0.86    | 0.75 to 0.99 | 0.03   |                  |
| 6                                                                       | 281 v. 350   | 1.11    | 0.94 to 1.31 | 0.22   |                  |
| 7                                                                       | 252 v. 350   | 1.18    | 1.00 to 1.41 | 0.05   |                  |

| Patient Characteristic | N          | $\beta$ | 95% CI       | <i>P</i> | % R <sup>2</sup> |
|------------------------|------------|---------|--------------|----------|------------------|
| 8                      | 223 v. 350 | 0.86    | 0.72 to 1.03 | 0.11     |                  |

AHLOS, Acute Hospital Length of Stay; CI, Confidence Interval; TIA, Transient Ischaemic Attack; COPD, Chronic Obstructive Pulmonary Disease; mRS, modified Rankin Scale; LACS, Lacunar Anterior Circulation Stroke; PACS, Partial Anterior Circulation Stroke; POCS, Posterior Circulation Stroke; TACS, Total Anterior Circulation Stroke.

**Table S6** Multiple linear regression complete case analysis for AHLOS (n=1496, R<sup>2</sup>=44.7%).

| Patient Characteristic                                                  | N           | $\beta$ | 95% CI       | P      |
|-------------------------------------------------------------------------|-------------|---------|--------------|--------|
| Age, y                                                                  | 1496        | 1.01    | 1.00 to 1.01 | <0.001 |
| Sex, female                                                             | 781 v. 715  | 0.98    | 0.90 to 1.07 | 0.66   |
| Recurrent Stroke                                                        | 328 v. 1168 | 1.06    | 0.96 to 1.17 | 0.27   |
| Diabetes Mellitus                                                       | 259 v. 1237 | 0.99    | 0.89 to 1.11 | 0.91   |
| Dementia                                                                | 138 v. 1358 | 1.32    | 1.13 to 1.53 | <0.001 |
| Hypercholesterolemia                                                    | 264 v. 1232 | 0.92    | 0.82 to 1.02 | 0.13   |
| Myocardial Infarction or Ischaemic Heart Disease*                       | 362 v. 1134 | 1.00    | 0.91 to 1.10 | 0.97   |
| Previous Cancer                                                         | 140 v. 1356 | 1.16    | 1.01 to 1.33 | 0.03   |
| COPD                                                                    | 76 v. 1420  | 0.91    | 0.76 to 1.09 | 0.31   |
| Pre-stroke mRS Score (reference 0)                                      |             |         |              | <0.001 |
| 1                                                                       | 284 v. 765  | 1.08    | 0.96 to 1.20 | 0.21   |
| 2                                                                       | 167 v. 765  | 0.93    | 0.80 to 1.08 | 0.33   |
| 3                                                                       | 149 v. 765  | 1.00    | 0.84 to 1.19 | 0.99   |
| 4 & 5                                                                   | 131 v. 765  | 0.77    | 0.63 to 0.93 | 0.01   |
| Pre-Stroke Residence (reference Independent living without formal care) |             |         |              | <0.001 |
| Independent living with formal care                                     | 145 v. 1215 | 1.02    | 0.88 to 1.19 | 0.78   |
| Institution                                                             | 136 v. 1215 | 0.83    | 0.69 to 0.98 | 0.03   |
| Haemorrhagic Stroke                                                     | 138 v. 1358 | 0.83    | 0.72 to 0.96 | 0.01   |
| Oxford Community Stroke Project Classification                          |             |         |              | <0.001 |
| PACS                                                                    | 570 v. 411  | 1.27    | 1.15 to 1.40 | <0.001 |
| POCS                                                                    | 214 v. 411  | 1.29    | 1.13 to 1.47 | <0.001 |
| TACS                                                                    | 301 v. 411  | 1.36    | 1.19 to 1.57 | <0.001 |
| No Brain Lateralisation                                                 | 174 v. 1322 | 0.93    | 0.81 to 1.05 | 0.24   |
| Inpatient Complication                                                  | 421 v. 1075 | 1.67    | 1.51 to 1.84 | <0.001 |
| Discharge mRS Score (reference 0)                                       |             |         |              | <0.001 |
| 1                                                                       | 295 v. 218  | 1.15    | 1.00 to 1.32 | 0.05   |
| 2                                                                       | 177 v. 218  | 1.60    | 1.36 to 1.88 | <0.001 |
| 3                                                                       | 243 v. 218  | 2.45    | 2.10 to 2.87 | <0.001 |
| 4                                                                       | 209 v. 218  | 3.39    | 2.86 to 4.02 | <0.001 |
| 5                                                                       | 121 v. 218  | 4.78    | 3.89 to 5.88 | <0.001 |
| 6                                                                       | 233 v. 218  | 1.34    | 1.11 to 1.61 | 0.002  |
| Winter Admission                                                        | 770 v. 726  | 1.16    | 1.07 to 1.25 | <0.001 |
| Weekend Admission                                                       | 401 v. 1095 | 1.06    | 0.97 to 1.15 | 0.23   |
| Hospital (reference1)                                                   |             |         |              | <0.001 |
| 2                                                                       | 14 v. 111   | 2.08    | 1.35 to 3.21 | 0.001  |
| 3                                                                       | 278 v. 111  | 1.20    | 1.01 to 1.44 | 0.04   |
| 4                                                                       | -           | -       | -            | -      |
| 5                                                                       | 558 v. 111  | 0.84    | 0.71 to 0.98 | 0.03   |
| 6                                                                       | 142 v. 111  | 1.03    | 0.85 to 1.26 | 0.75   |
| 7                                                                       | 191 v. 111  | 1.35    | 1.13 to 1.62 | 0.001  |
| 8                                                                       | 202 v. 111  | 0.94    | 0.78 to 1.13 | 0.49   |

AHLOS, Acute Hospital Length of Stay; CI, Confidence Interval; COPD, Chronic Obstructive Pulmonary Disease; mRS, modified Rankin Scale; LACS, Lacunar Anterior Circulation Stroke; PACS, Partial Anterior Circulation Stroke; POCS, Posterior Circulation Stroke; TACS, Total Anterior Circulation Stroke.



**Table S7** Multiple linear regression sensitivity analysis for AHLOS, excluding Hospital 2 using multiple imputed dataset (n=2217, R<sup>2</sup>=44.7%).

| Patient Characteristic                                                  | e <sup>β</sup> * | 95% CI*      | P      |
|-------------------------------------------------------------------------|------------------|--------------|--------|
| Age, y                                                                  | 1.01             | 1.00 to 1.01 | <0.001 |
| Sex, female                                                             | 1.01             | 0.94 to 1.08 | 0.86   |
| Recurrent Stroke                                                        | 1.02             | 0.93 to 1.12 | 0.68   |
| Diabetes Mellitus                                                       | 1.07             | 0.97 to 1.17 | 0.19   |
| Dementia                                                                | 1.30             | 1.13 to 1.48 | <0.001 |
| Hypercholesterolemia                                                    | 0.95             | 0.86 to 1.05 | 0.33   |
| Myocardial Infarction or Ischaemic Heart Disease*                       | 1.00             | 0.91 to 1.08 | 0.92   |
| Previous Cancer                                                         | 1.13             | 0.99 to 1.27 | 0.06   |
| COPD                                                                    | 0.90             | 0.77 to 1.06 | 0.21   |
| Pre-stroke mRS Score (reference 0)                                      |                  |              | <0.001 |
| 1                                                                       | 1.08             | 0.96 to 1.21 | 0.19   |
| 2                                                                       | 0.90             | 0.78 to 1.04 | 0.16   |
| 3                                                                       | 0.94             | 0.79 to 1.10 | 0.47   |
| 4 & 5                                                                   | 0.69             | 0.58 to 0.83 | <0.001 |
| Pre-Stroke Residence (reference Independent living without formal care) |                  |              | <0.001 |
| Independent living with formal care                                     | 1.01             | 0.88 to 1.16 | 0.91   |
| Institution                                                             | 0.81             | 0.69 to 0.95 | 0.01   |
| Haemorrhagic Stroke                                                     | 0.80             | 0.71 to 0.90 | <0.001 |
| Oxford Community Stroke Project Classification (reference LACS)         |                  |              | <0.001 |
| PACS                                                                    | 1.30             | 1.18 to 1.43 | <0.001 |
| POCS                                                                    | 1.34             | 1.18 to 1.53 | <0.001 |
| TACS                                                                    | 1.29             | 1.13 to 1.47 | <0.001 |
| No Brain Lateralisation                                                 | 0.85             | 0.75 to 0.95 | 0.01   |
| Inpatient Complication                                                  | 1.70             | 1.57 to 1.85 | <0.001 |
| Discharge mRS Score (reference 0)                                       |                  |              | <0.001 |
| 1                                                                       | 1.15             | 1.00 to 1.32 | 0.04   |
| 2                                                                       | 1.74             | 1.48 to 2.04 | <0.001 |
| 3                                                                       | 2.72             | 2.34 to 3.16 | <0.001 |
| 4                                                                       | 3.56             | 3.02 to 4.20 | <0.001 |
| 5                                                                       | 5.12             | 4.22 to 6.22 | <0.001 |
| 6                                                                       | 1.25             | 1.05 to 1.48 | 0.01   |
| Winter Admission                                                        | 1.15             | 1.08 to 1.24 | <0.001 |
| Weekend Admission                                                       | 1.03             | 0.95 to 1.11 | 0.48   |
| Hospital (reference 1)                                                  |                  |              | <0.001 |
| 3                                                                       | 1.08             | 0.94 to 1.22 | 0.29   |
| 4                                                                       | 1.07             | 0.89 to 1.29 | 0.40   |
| 5                                                                       | 0.78             | 0.70 to 0.87 | <0.001 |
| 6                                                                       | 0.93             | 0.81 to 1.07 | 0.33   |
| 7                                                                       | 1.15             | 1.00 to 1.32 | 0.05   |
| 8                                                                       | 0.82             | 0.70 to 0.95 | 0.01   |

AHLOS, Acute Hospital Length of Stay; CI, Confidence Interval; COPD, Chronic Obstructive Pulmonary Disease; mRS, modified Rankin Scale; LACS, Lacunar Anterior Circulation Stroke; PACS, Partial Anterior Circulation Stroke; POCS, Posterior Circulation Stroke; TACS, Total Anterior Circulation Stroke.

**Table S8** Multiple linear regression sensitivity analysis for AHLOS, including discharge destination using multiple imputed dataset (n=2233, R<sup>2</sup>=40%).

| Patient Characteristic                                                   | e <sup>β</sup> * | 95% CI*      | P      |
|--------------------------------------------------------------------------|------------------|--------------|--------|
| Age, y                                                                   | 1.01             | 1.00 to 1.01 | <0.001 |
| Sex, female                                                              | 0.99             | 0.92 to 1.07 | 0.80   |
| Recurrent Stroke                                                         | 1.00             | 0.91 to 1.10 | 1.00   |
| Diabetes Mellitus                                                        | 1.08             | 0.98 to 1.19 | 0.12   |
| Dementia                                                                 | 1.20             | 1.05 to 1.38 | 0.01   |
| Hypercholesterolemia                                                     | 0.94             | 0.85 to 1.04 | 0.25   |
| Myocardial Infarction or Ischaemic Heart                                 | 1.01             | 0.93 to 1.10 | 0.83   |
| Previous Cancer                                                          | 1.17             | 1.03 to 1.33 | 0.01   |
| COPD                                                                     | 0.91             | 0.77 to 1.07 | 0.23   |
| Pre-stroke mRS Score (reference 0)                                       |                  |              | <0.001 |
| 1                                                                        | 1.15             | 1.03 to 1.28 | 0.02   |
| 2                                                                        | 1.15             | 1.00 to 1.33 | 0.05   |
| 3                                                                        | 1.33             | 1.13 to 1.56 | <0.001 |
| 4 & 5                                                                    | 1.15             | 0.96 to 1.38 | 0.12   |
| Pre-Stroke Residence (reference Independent living without formal care)  |                  |              | <0.001 |
| Independent living with formal care                                      | 0.86             | 0.75 to 0.99 | 0.04   |
| Institution                                                              | 0.52             | 0.44 to 0.62 | <0.001 |
| Haemorrhagic Stroke                                                      | 0.84             | 0.75 to 0.95 | <0.001 |
| Oxford Community Stroke Project Classification (reference LACS)          |                  |              | <0.001 |
| PACS                                                                     | 1.34             | 1.22 to 1.48 | <0.001 |
| POCS                                                                     | 1.44             | 1.26 to 1.63 | <0.001 |
| TACS                                                                     | 1.49             | 1.31 to 1.70 | <0.001 |
| No Brain Lateralisation                                                  | 0.82             | 0.73 to 0.93 | <0.001 |
| Inpatient Complication                                                   | 1.72             | 1.58 to 1.87 | <0.001 |
| Discharge Destination (reference Independent living without formal care) |                  |              | <0.001 |
| Independent living with formal care                                      | 1.99             | 1.74 to 2.27 | <0.001 |
| Institution                                                              | 3.58             | 3.09 to 4.15 | <0.001 |
| Interim/Rehab Setting                                                    | 2.18             | 1.94 to 2.46 | <0.001 |
| Death                                                                    | 0.85             | 0.74 to 0.97 | 0.02   |
| Winter Admission                                                         | 1.15             | 1.07 to 1.24 | <0.001 |
| Weekend Admission                                                        | 1.04             | 0.96 to 1.13 | 0.30   |
| Hospital (reference 1)                                                   |                  |              | <0.001 |
| 2                                                                        | 2.76             | 1.80 to 4.22 | <0.001 |
| 3                                                                        | 1.24             | 1.09 to 1.42 | <0.001 |
| 4                                                                        | 1.36             | 1.15 to 1.61 | <0.001 |
| 5                                                                        | 0.85             | 0.75 to 0.95 | 0.01   |
| 6                                                                        | 1.06             | 0.92 to 1.22 | 0.42   |
| 7                                                                        | 1.19             | 1.03 to 1.37 | 0.02   |
| 8                                                                        | 0.99             | 0.85 to 1.14 | 0.84   |

AHLOS, Acute Hospital Length of Stay; CI, Confidence Interval; COPD, Chronic Obstructive Pulmonary Disease; mRS, modified Rankin Scale; LACS, Lacunar Anterior Circulation Stroke; PACS, Partial Anterior Circulation Stroke; POCS, Posterior Circulation Stroke; TACS, Total Anterior Circulation Stroke.

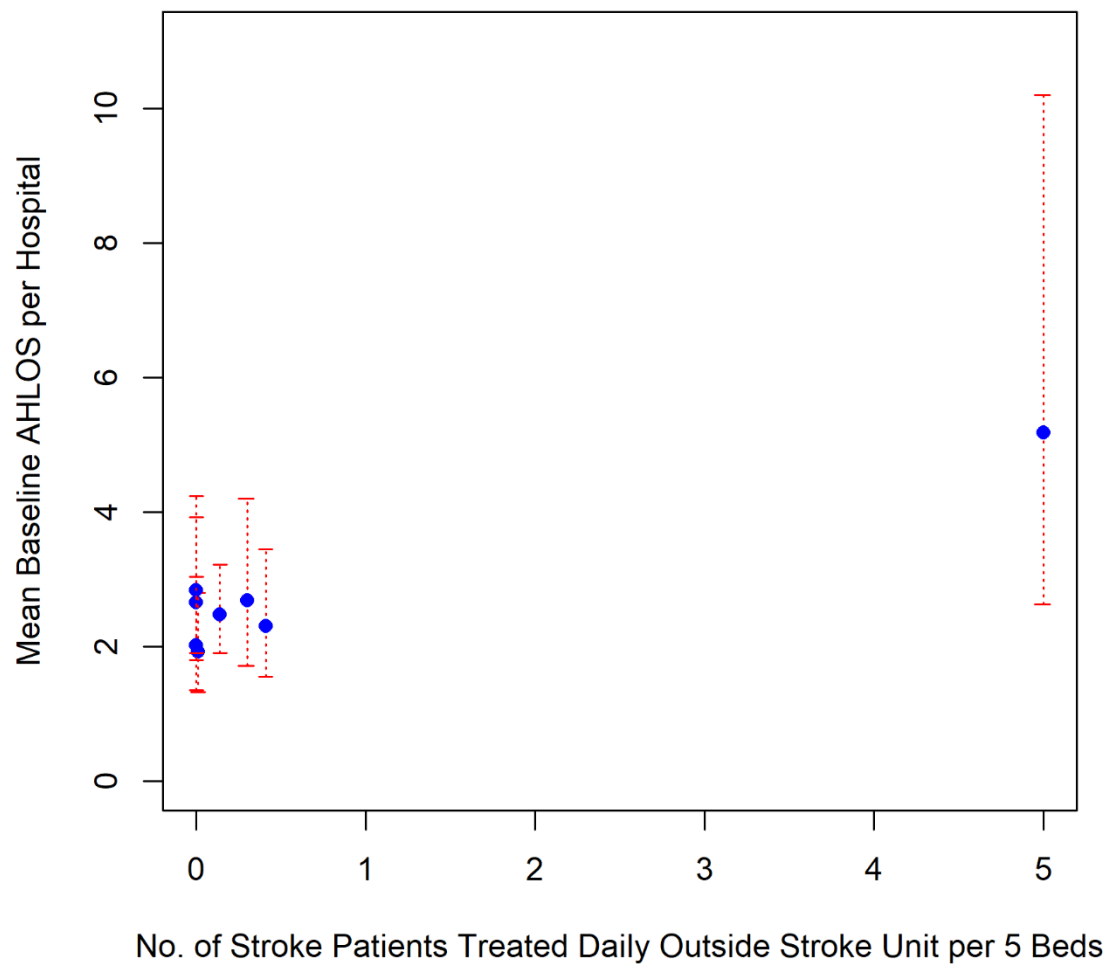

**Figure S1** Model estimates of mean baseline acute hospital length of stay (AHLOS) per hospital (in days) and number of stroke patients treated outside the stroke unit per day per five stroke unit beds with 95% confidence intervals. Multiple regression model was adjusted for patient covariates that had a p-value<0.3 in univariable analysis.

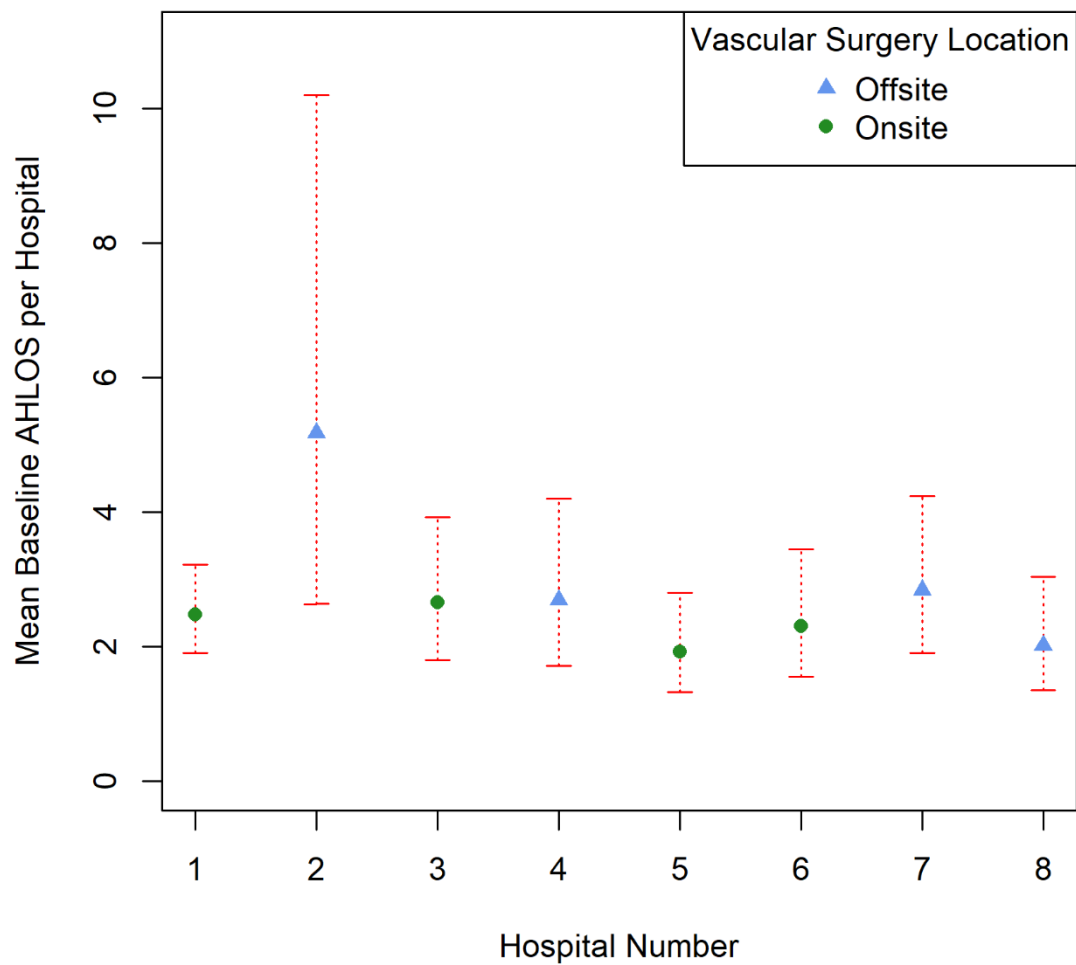

**Figure S2** Model estimates of mean baseline acute hospital length of stay (AHLOS) per hospital (in days) and presence of vascular surgery onsite with 95% confidence intervals. Multiple regression model was adjusted for patient covariates that had a p-value<0.3 in univariable analysis.

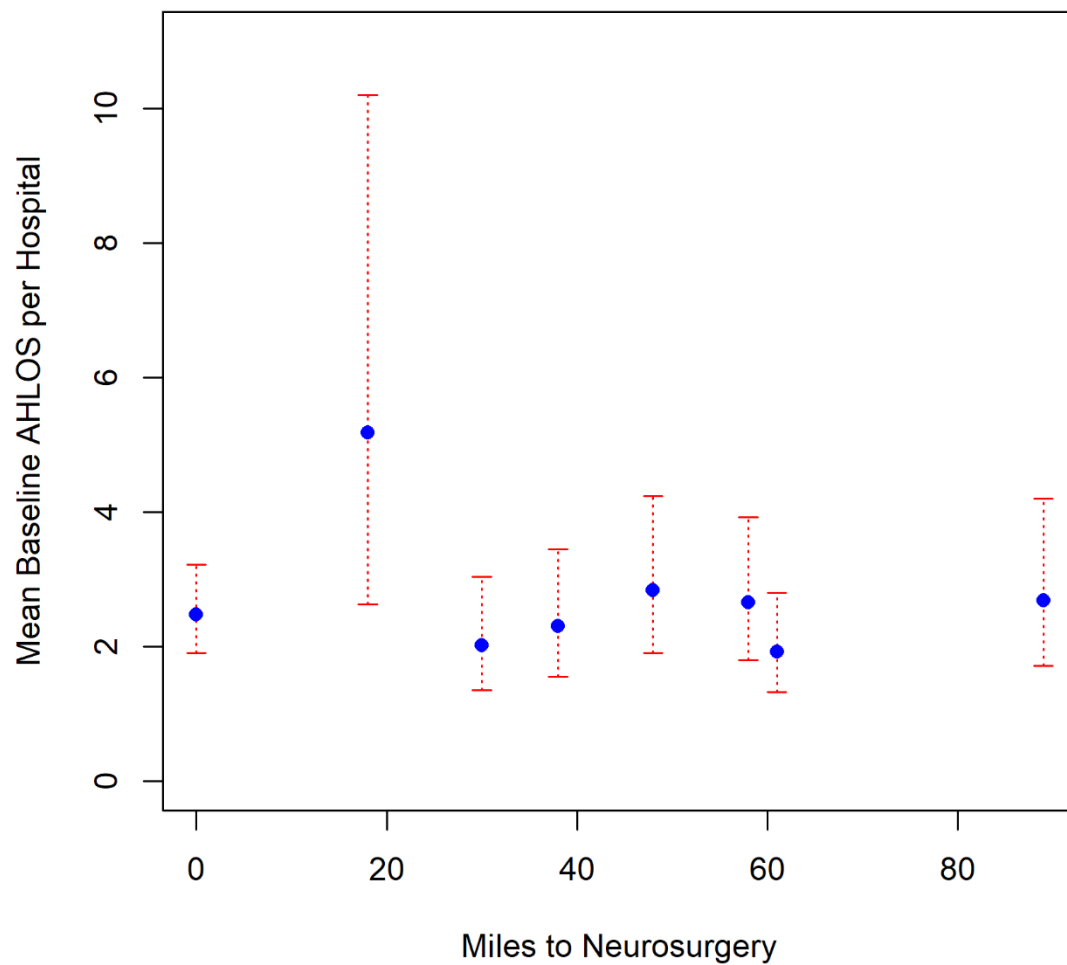

**Figure S3** Model estimates of mean baseline acute hospital length of stay (AHLOS) per hospital (in days) and distance to neurosurgical facility with 95% confidence intervals. Multiple regression model was adjusted for patient covariates that had a p-value<0.3 in univariable analysis.

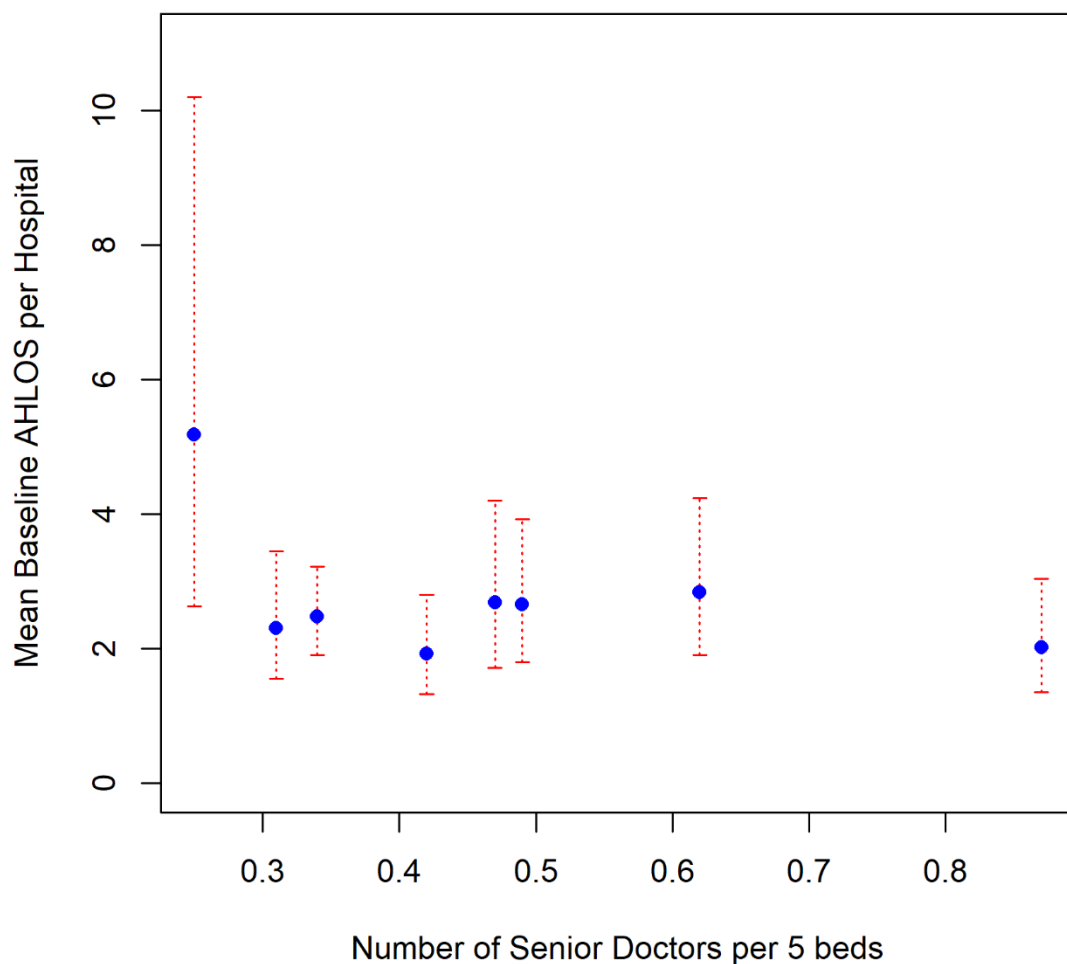

**Figure S4** Model estimates of mean baseline acute hospital length of stay (AHLOS) per hospital (in days) and number of fte senior doctors per five beds available during weekdays with 95% confidence intervals. Multiple regression model was adjusted for patient covariates that had a p-value<0.3 in univariable analysis.

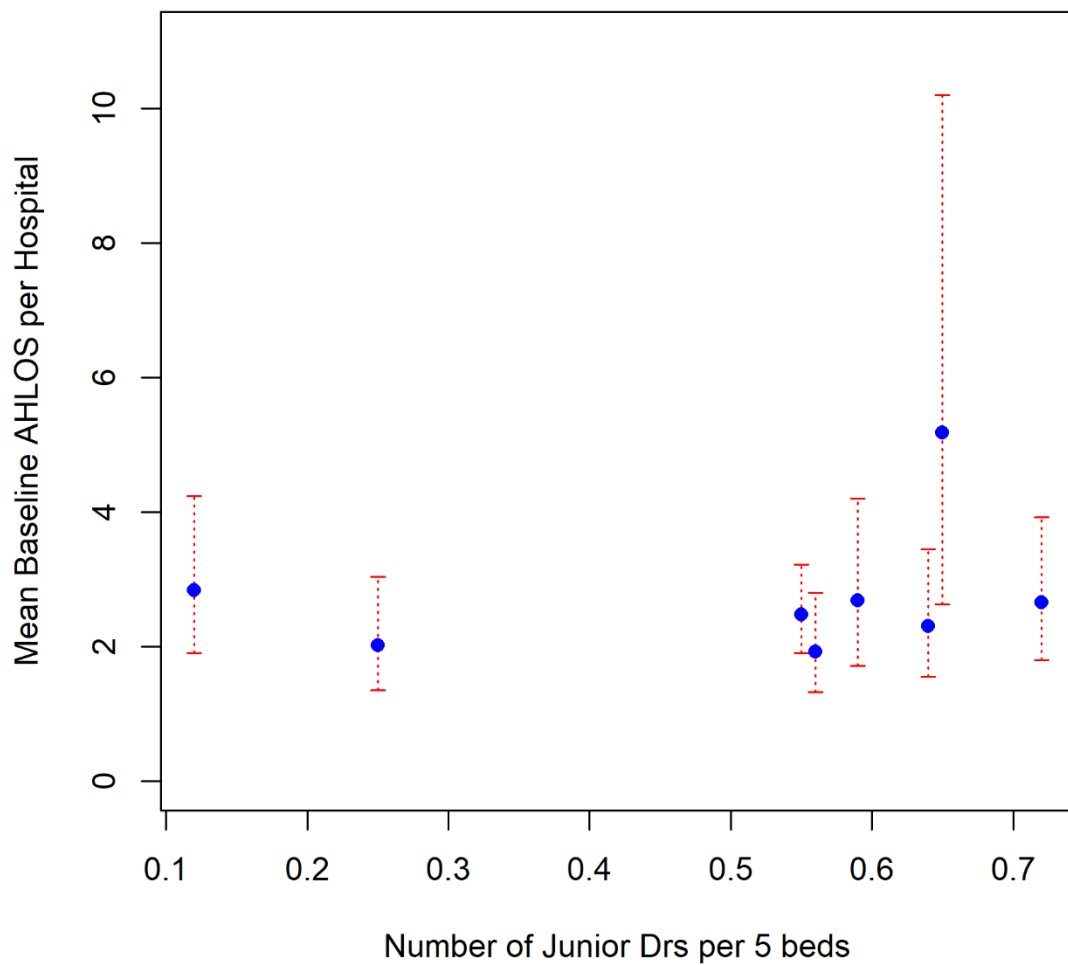

**Figure S5** Model estimates of mean baseline acute hospital length of stay (AHLOS) per hospital (in days) and number of fte junior doctors per five beds available during weekdays with 95% confidence intervals. Multiple regression model was adjusted for patient covariates that had a p-value<0.3 in univariable analysis.



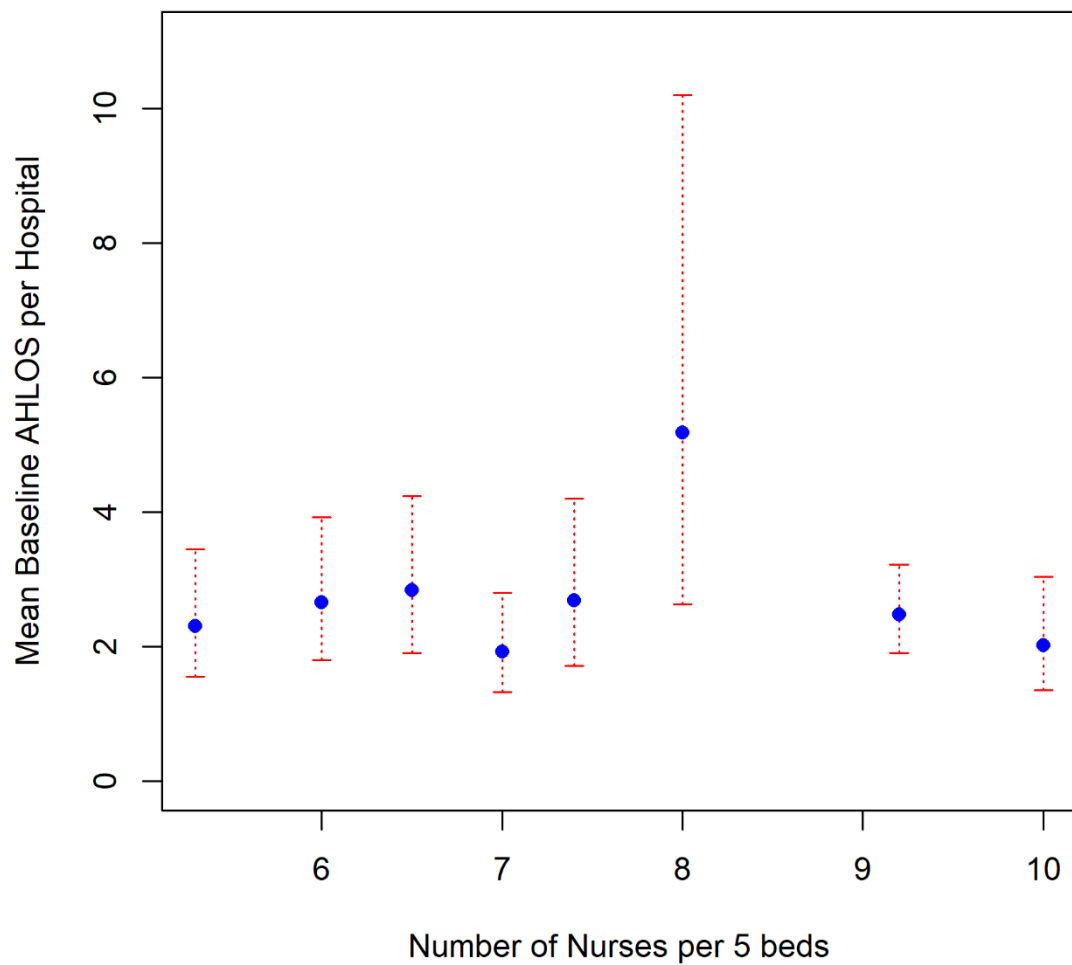

**Figure S6** Model estimates of mean baseline acute hospital length of stay (AHLOS) per hospital (in days) and number of fte health care associates and nurses per five beds with 95% confidence intervals. Multiple regression model was adjusted for patient covariates that had a p-value<0.3 in univariable analysis.

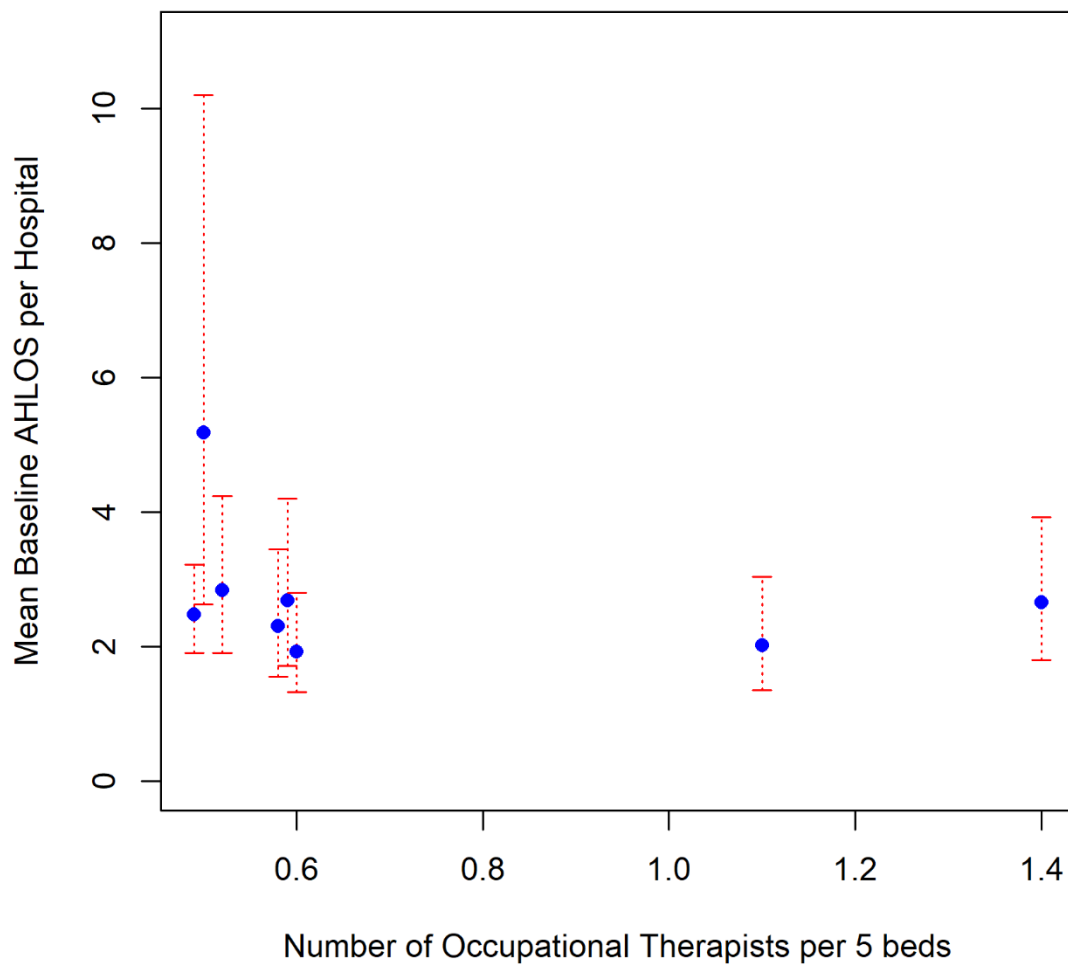

**Figure S7** Model estimates of mean baseline acute hospital length of stay (AHLOS) per hospital (in days) and number of fte occupational therapists per five beds with 95% confidence intervals. Multiple regression model was adjusted for patient covariates that had a p-value<0.3 in univariable analysis.

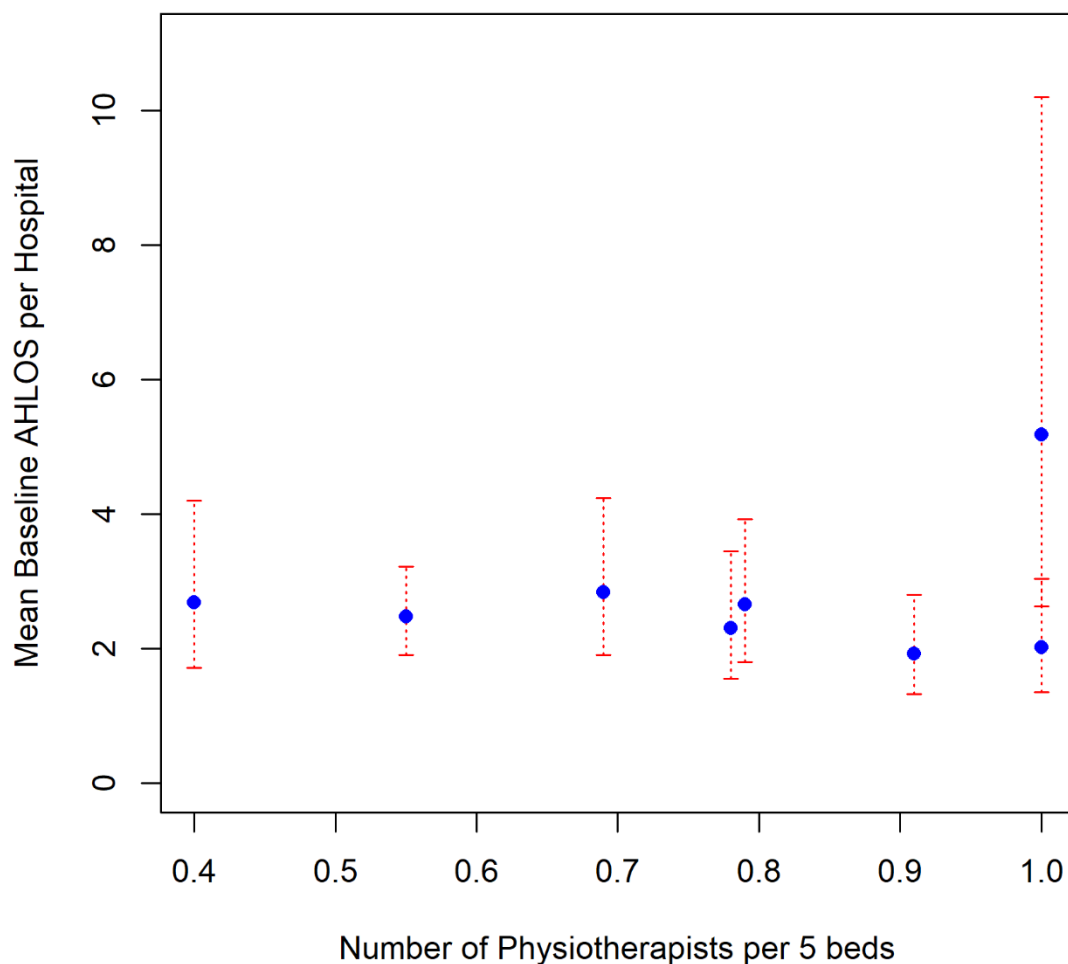

**Figure S8** Model estimates of mean baseline acute hospital length of stay (AHLOS) per hospital (in days) and number of fte physiotherapists per five beds with 95% confidence intervals. Multiple regression model was adjusted for patient covariates that had a p-value<0.3 in univariable analysis.

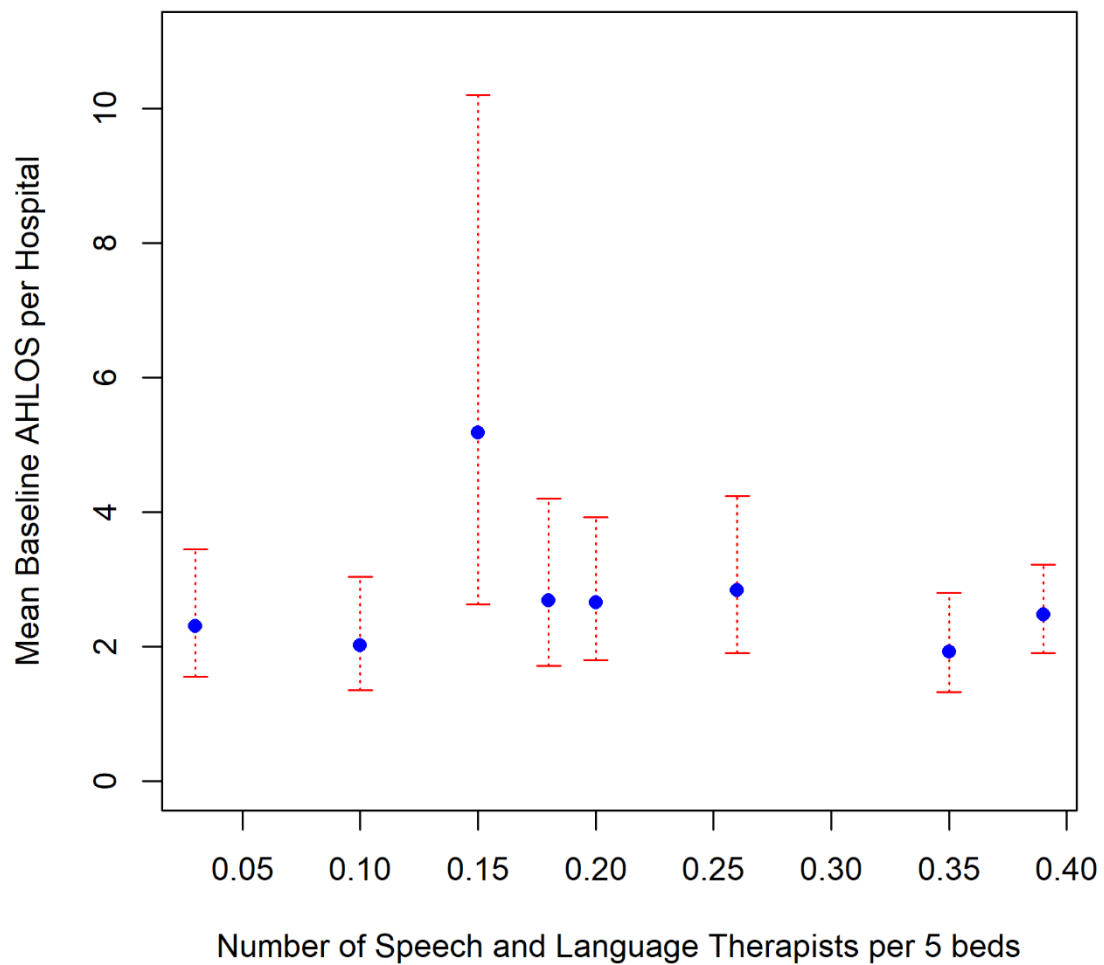

**Figure S9** Model estimates of mean baseline acute hospital length of stay (AHLOS) per hospital (in days) and number of fte speech and language therapists per five beds with 95% confidence intervals. Multiple regression model was adjusted for patient covariates that had a p-value<0.3 in univariable analysis.

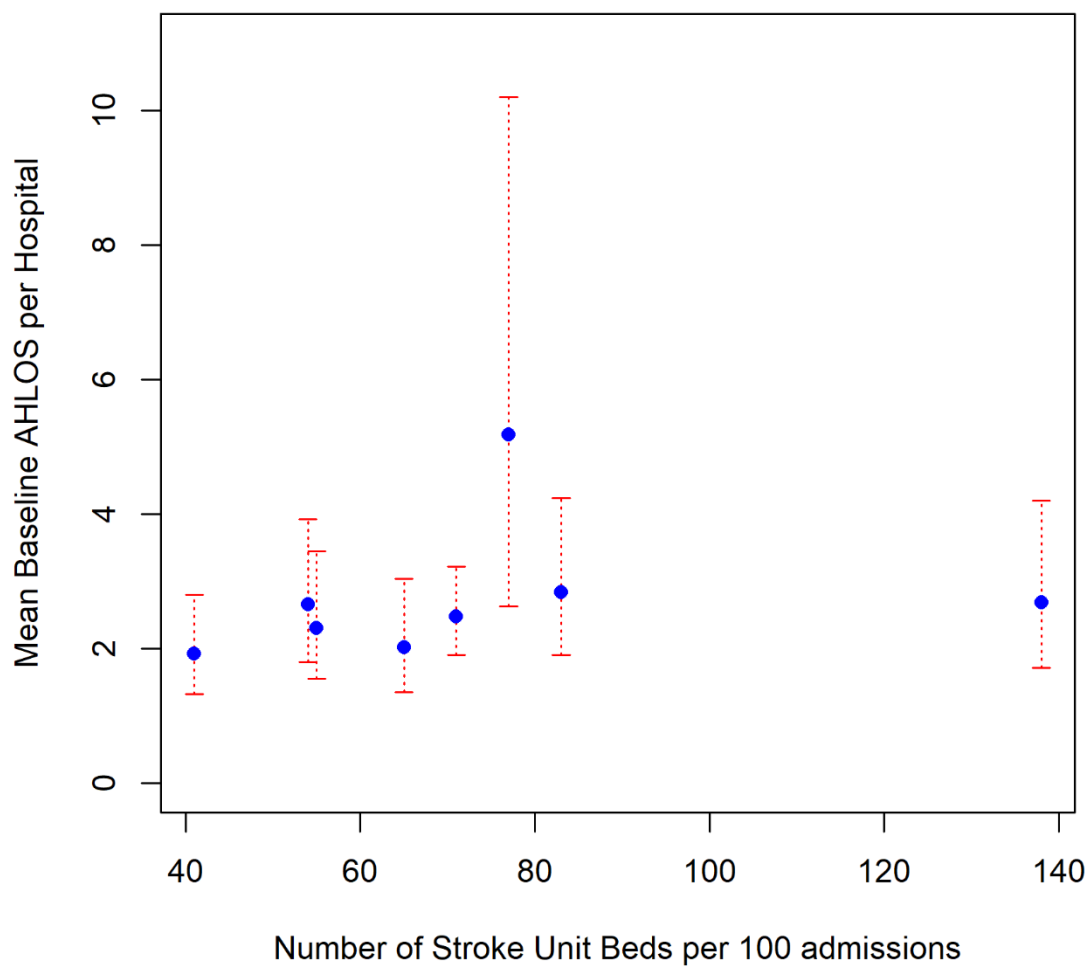

**Figure S10** Model estimates of mean baseline acute hospital length of stay (AHLOS) per hospital (in days) and number of total beds present on stroke unit per 100 admissions with 95% confidence intervals. Multiple regression model was adjusted for patient covariates that had a p-value<0.3 in univariable analysis.

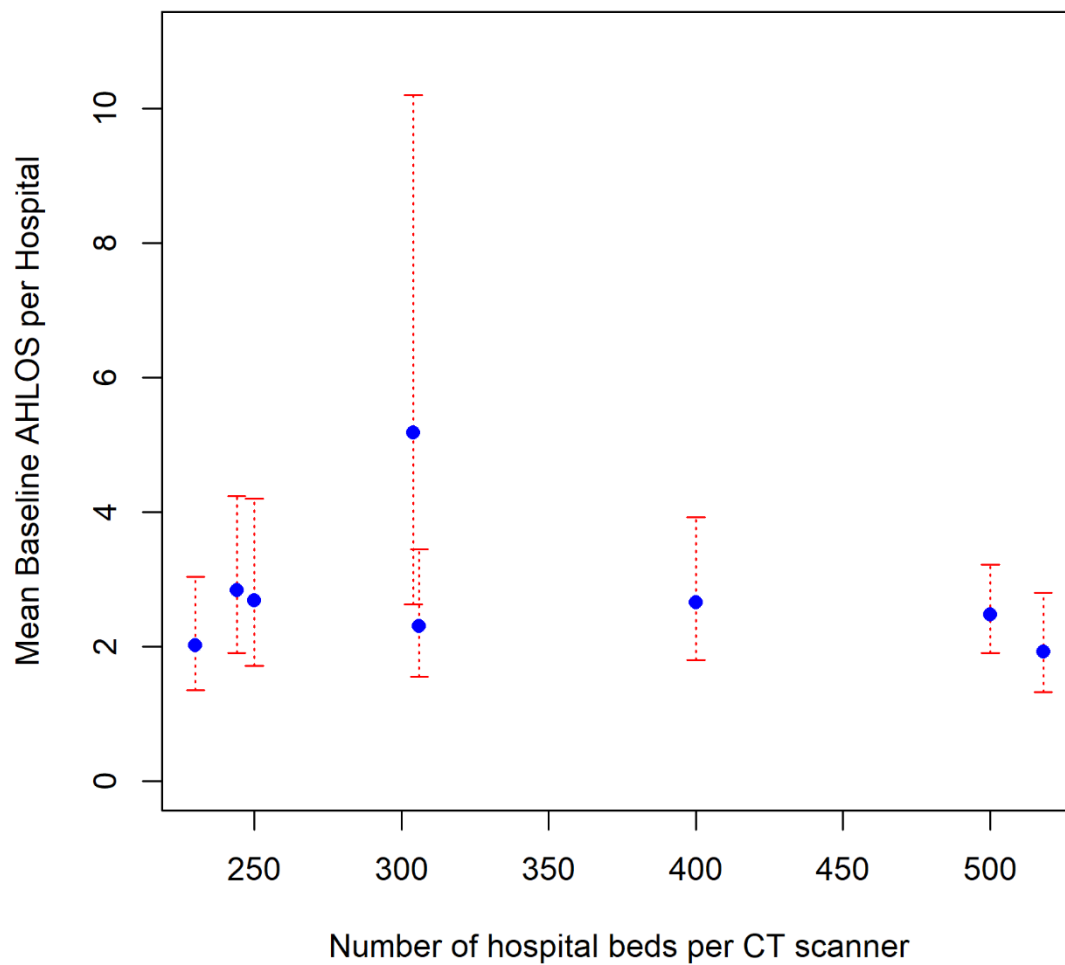

**Figure S11** Model estimates of mean baseline acute hospital length of stay (AHLOS) per hospital (in days) and number of hospital beds per computed tomography (CT) scanner with 95% confidence intervals. Multiple regression model was adjusted for patient covariates that had a p-value<0.3 in univariable analysis.

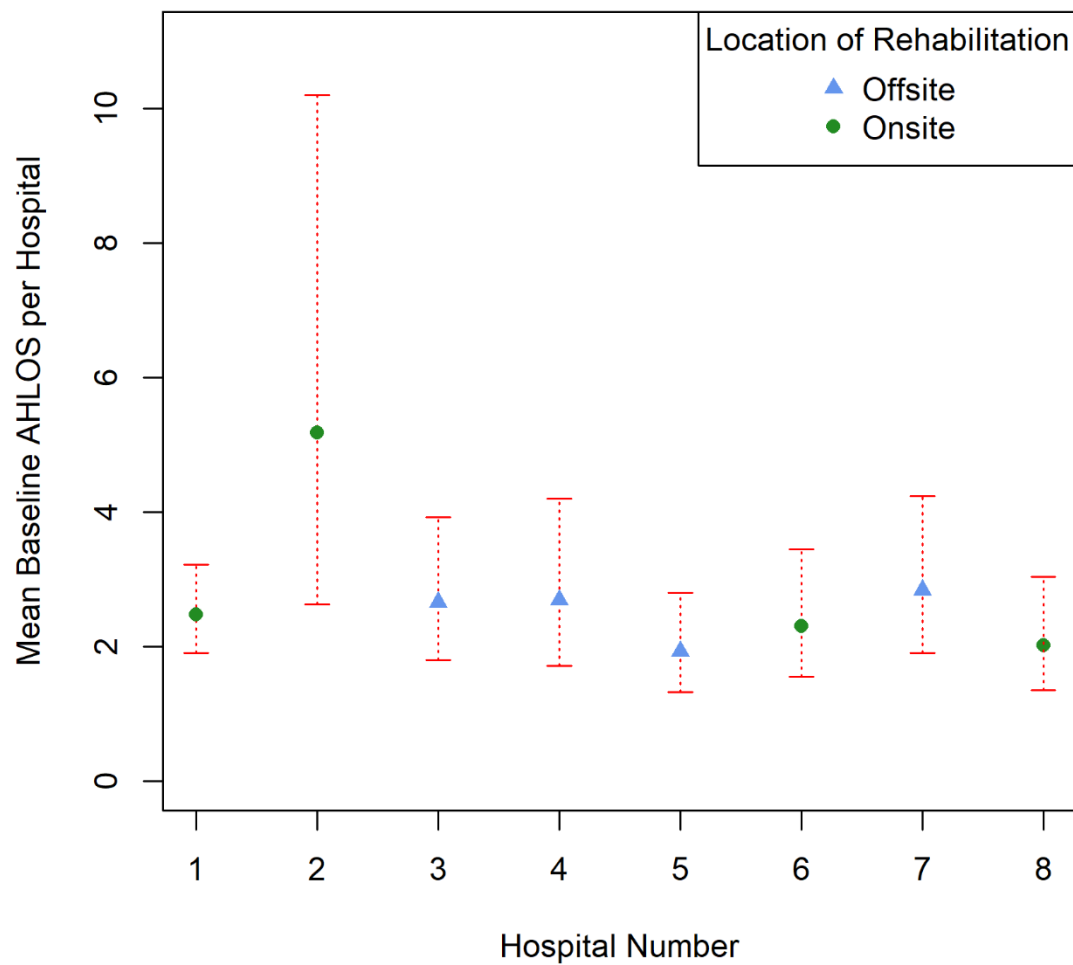

**Figure S12** Model estimates of mean baseline acute hospital length of stay (AHLOS) per hospital (in days) and provision of onsite rehabilitation service with 95% confidence intervals. Multiple regression model was adjusted for patient covariates that had a p-value<0.3 in univariable analysis.

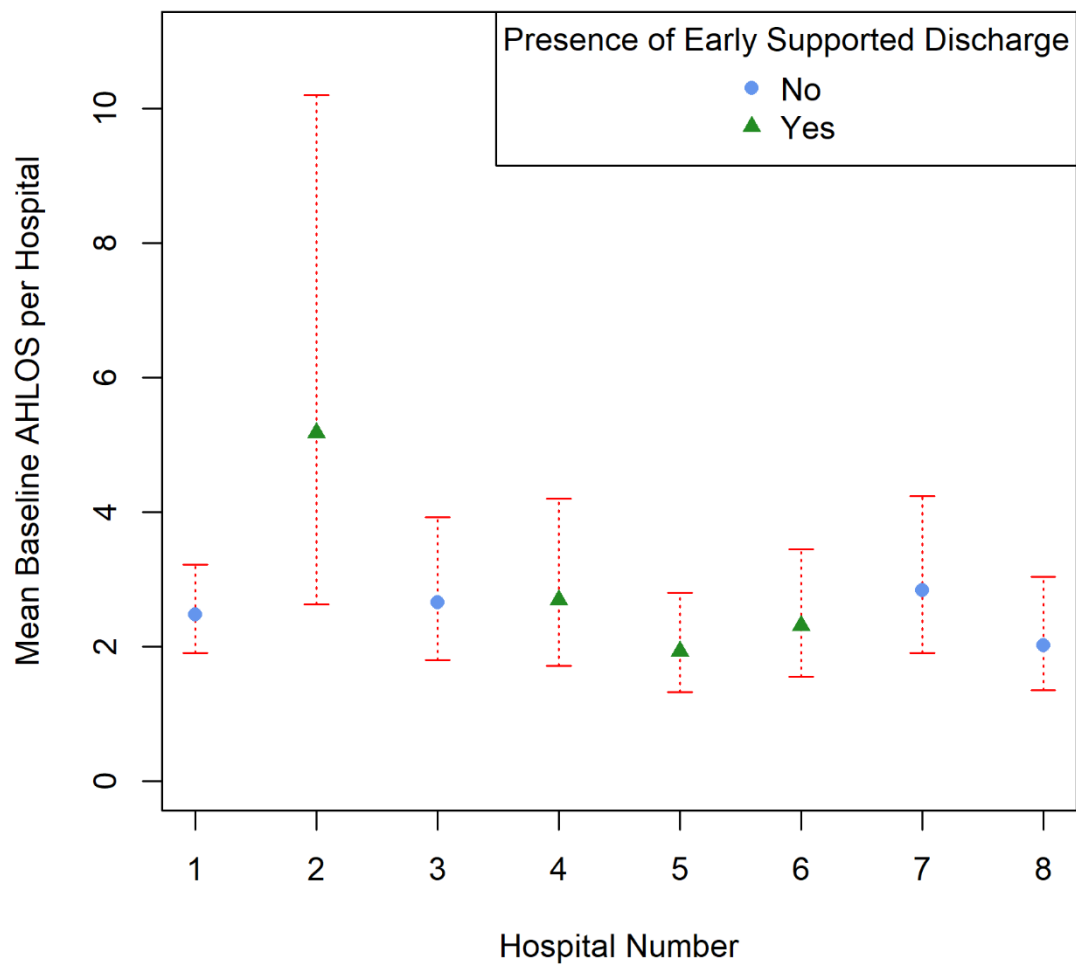

**Figure S13** Model estimates of mean baseline acute hospital length of stay (AHLOS) per hospital (in days) and presence of early supported discharge scheme with 95% confidence intervals. Multiple regression model was adjusted for patient covariates that had a p-value<0.3 in univariable analysis.



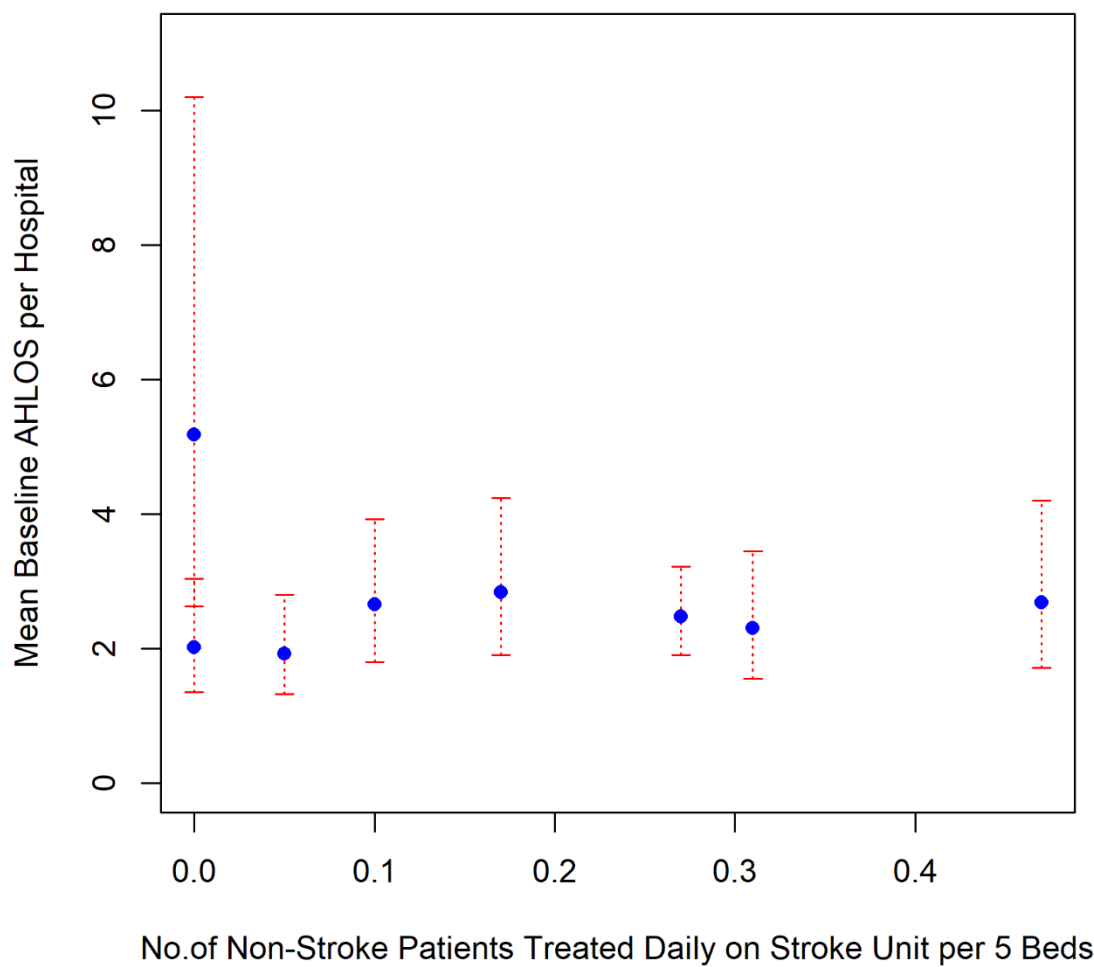

**Figure S14** Model estimates of mean baseline acute hospital length of stay (AHLOS) per hospital (in days) and number of non-stroke patients present on the stroke unit per day per five stroke unit beds with 95% confidence intervals. Multiple regression model was adjusted for patient covariates that had a p-value<0.3 in univariable analysis.

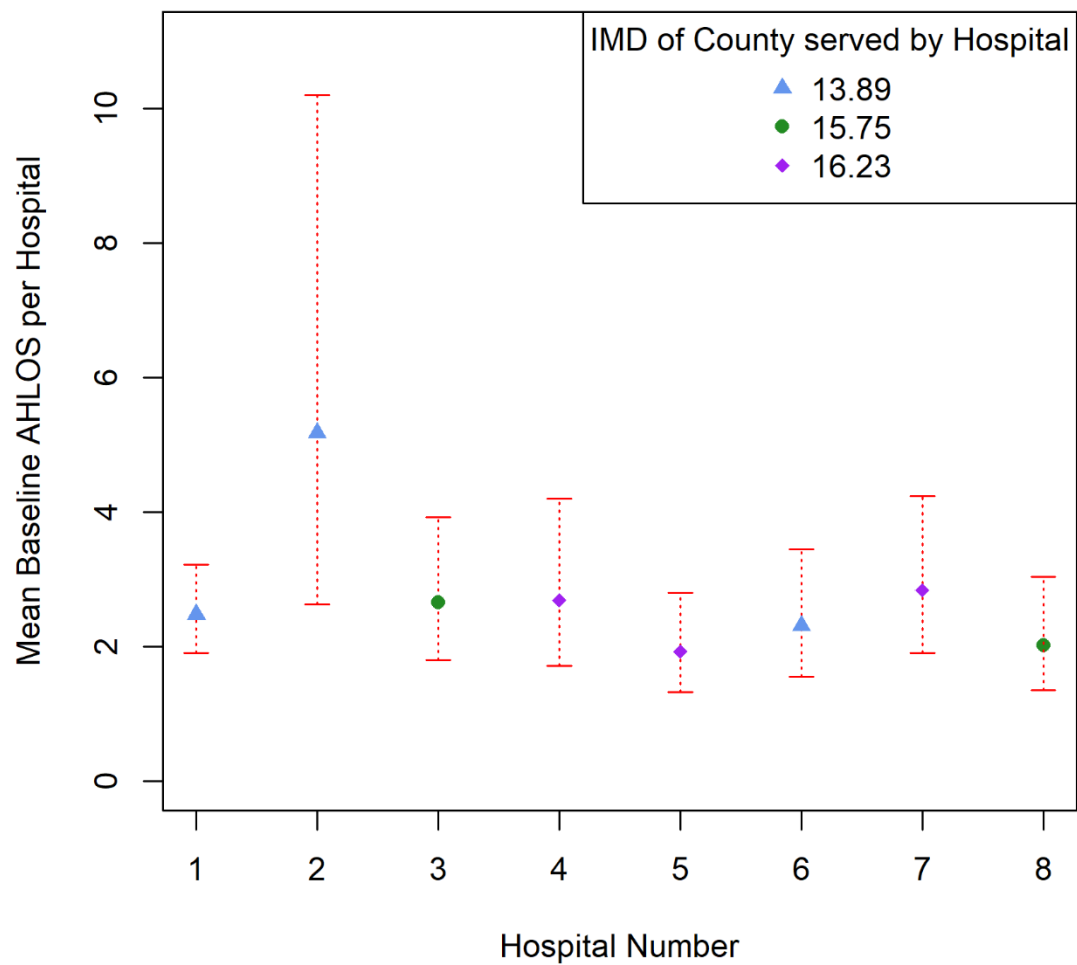

**Figure S15** Model estimates of mean baseline acute hospital length of stay (AHLOS) per hospital (in days) and mean Index of Multiple Deprivation (IMD) score of the counties in which the hospital serves with 95% confidence intervals. Multiple regression model was adjusted for patient covariates that had a p-value<0.3 in univariable analysis.
